# Supplementary material for: Testing the parasite mass burden effect on host behaviour alteration in the Schistocephalus -stickleback system
Source: Oxford University Press journal article supplement (doi:10.1242/jeb.174748), 2018-01-01
Supplement: jeb174748supp.pdf [file jeb174748supp.pdf]

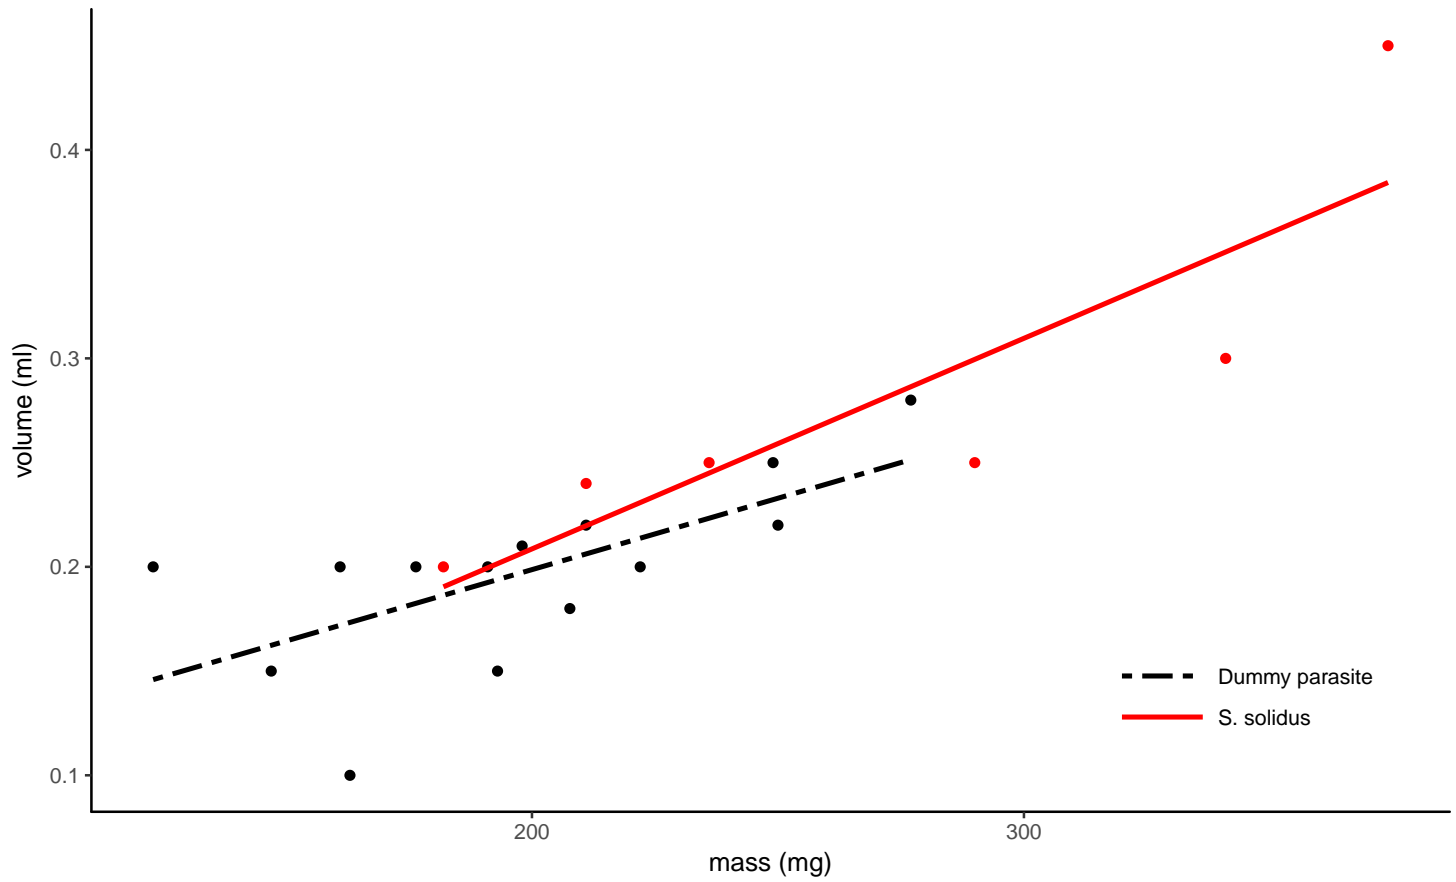

**Figure S1. The artificial parasite and *S. solidus* worms have similar densities.** Relationship between mass (mg) and volume (ml) of the silicone-made dummy parasite (dash-dotted black line) and the parasite *S. solidus* (solid red line).

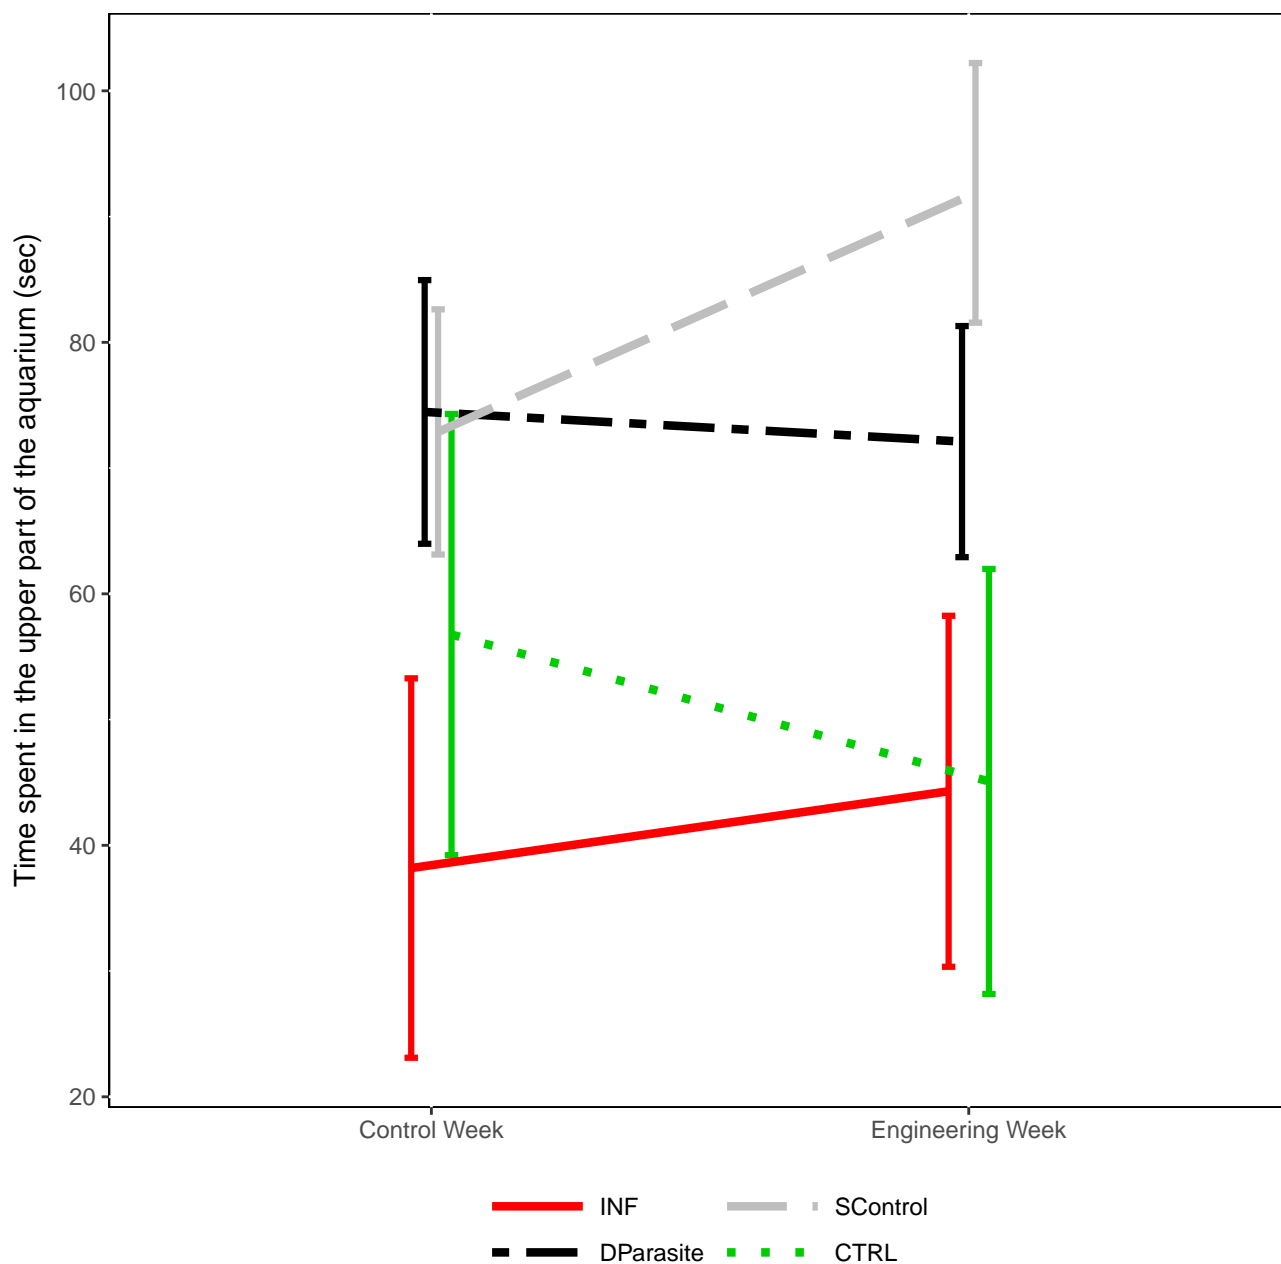

**Figure S2. Geotaxis did not differ significantly between treatments.** Time spent in the upper section of the aquarium (average and standard error) for each experimental treatment (artificial parasite, infected fish, silicone control, and control fish) and week of treatment (control week and engineering week). DP: dummy parasite (dash-dotted black line, n=15), INF: infected (solid red line, n=5), SC: silicone control (dashed grey line, n=14), and CTRL: non-infected (dotted green line, n=6).

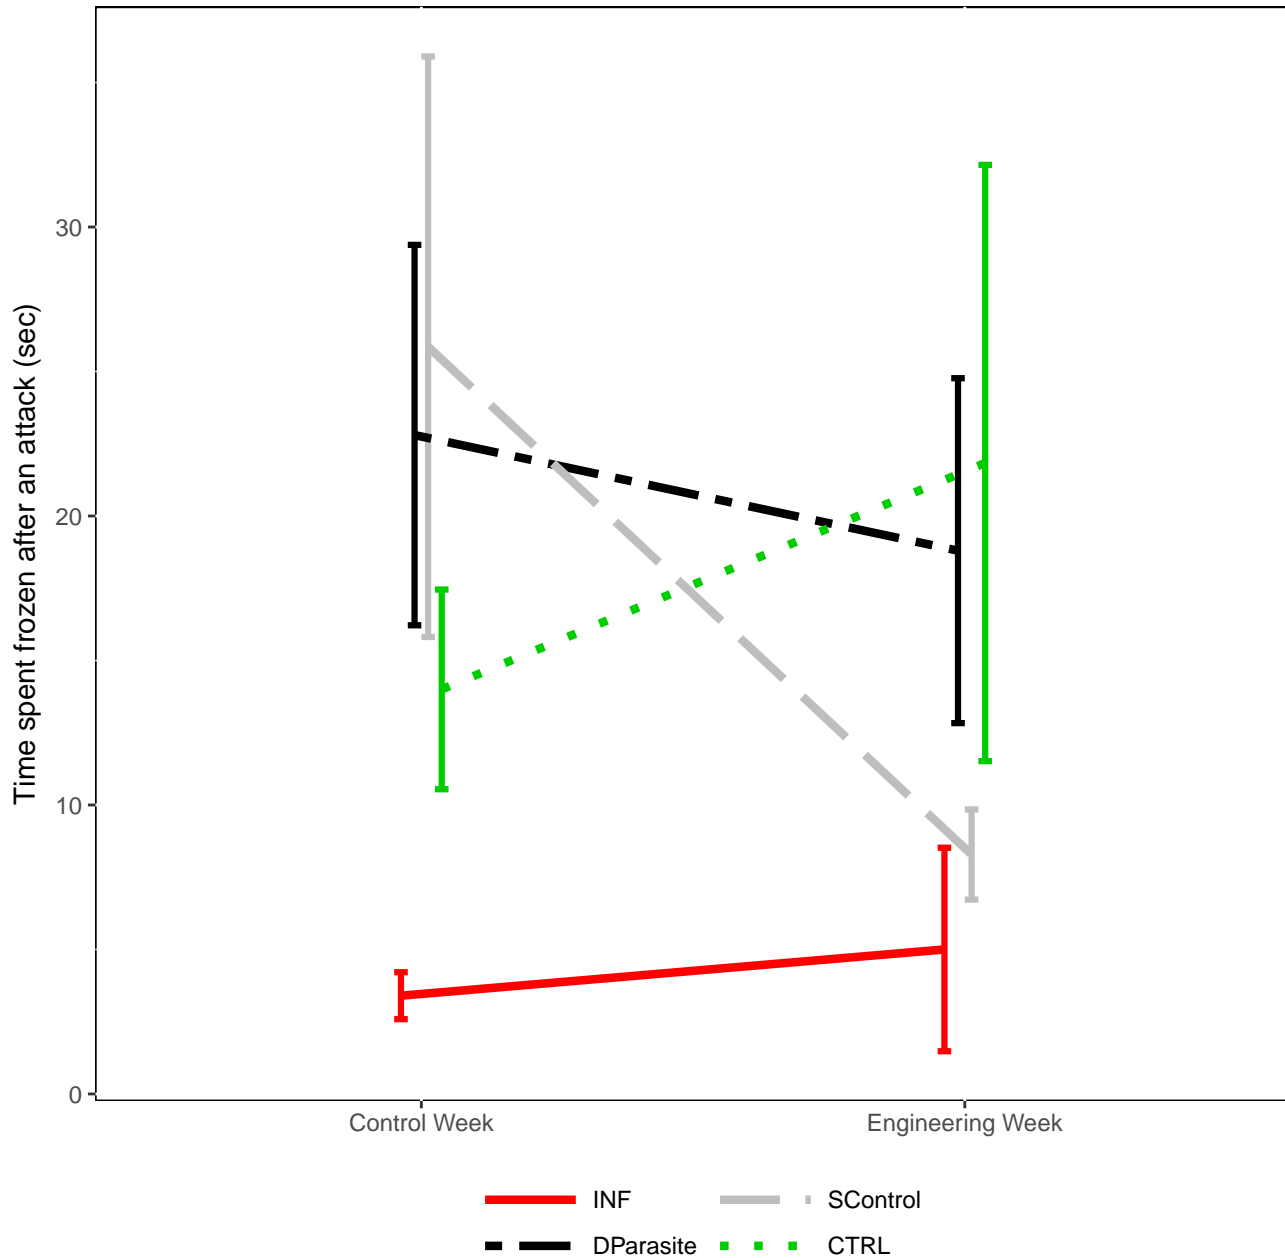

**Figure S3. Freezing response to a predator presence did not differ significantly between treatments.** Time spent frozen after an attack (average and standard error) for each experimental treatment (artificial parasite, infected fish, silicone control, and control fish) and week of treatment (control week and engineering week). DP: dummy parasite (dash-dotted black line, n=15), INF: infected (solid red line, n=5), SC: silicone control (dashed grey line, n=14), and CTRL: non-infected (dotted green line, n=6).

Table S1. Statistical parameters of ANOVAS testing the effect of treatment, week of measurement and their interaction on a given behaviour.

| Behaviour                   | Results ANOVA  |      |    |         |
|-----------------------------|----------------|------|----|---------|
|                             | Factor         | F    | Df | P-value |
| Latency to enter the center | Treatment      | 3.24 | 3  | 0.03    |
|                             | Week           | 1.59 | 1  | 0.21    |
|                             | Treatment*week | 0.80 | 3  | 0.50    |
| Time in the center          | Treatment      | 5.24 | 3  | 0.0042  |
|                             | Week           | 1.22 | 1  | 0.28    |
|                             | Treatment*week | 2.17 | 3  | 0.11    |
| Time spent near the surface | Treatment      | 2.99 | 3  | 0.44    |
|                             | Week           | 0.41 | 1  | 0.53    |
|                             | Treatment*week | 1.14 | 3  | 0.34    |
| Latency to feed             | Treatment      | 3.20 | 3  | 0.035   |
|                             | Week           | 0.60 | 1  | 0.44    |
|                             | Treatment*week | 0.19 | 3  | 0.90    |
| Latency to freeze           | Treatment      | 6.49 | 3  | 0.001   |
|                             | Week           | 0.45 | 1  | 0.50    |
|                             | Treatment*week | 0.14 | 3  | 0.93    |
| Time spent frozen           | Treatment      | 2.48 | 3  | 0.076   |
|                             | Week           | 3.86 | 1  | 0.057   |
|                             | Treatment*week | 0.87 | 3  | 0.46    |

Table S2. Statistically significant comparisons between two treatments for a given behaviour test. INF: infected. DP: artificial worm. SC: silicone control.

| Behaviour                   | Results post hoc tests |          |            |         |
|-----------------------------|------------------------|----------|------------|---------|
|                             | Comparisons            | Estimate | Std. Error | p-value |
| Latency to enter the center | INF - DP               | -22.3    | 8.62       | 0.0554  |
| Time in the center          | INF - DP               | 25.53    | 7.77       | 0.0084  |
|                             | INF - SC               | 28.38    | 7.84       | 0.003   |
| Time spent near the surface | INF- SC                | -24.67   | 9.63       | 0.0601  |
| Latency to feed             | INF- DP                | -24.8    | 8.41       | 0.0218  |
|                             | INF - SC               | -23.9    | 8.48       | 0.0306  |
| Latency to freeze           | INF- DP                | -36.3    | 8.36       | 0.0003  |
|                             | INF - SC               | -27.8    | 8.43       | 0.0082  |

[Click here to Download Supplementary dataset 1](#)
